# Supplementary material for: A selective pyridinedicarbohydrazide-based “naked-eye” fluorescent probe for detecting Cu 2+ ions in aqueous solutions
Source: Research Square preprint supplement (doi:10.21203/rs.3.rs-6740853/v1), 2025-06-10
Supplement: Supplementary file 1 [file 27d89ed3b1c5f4c1cc8bc8cd.docx]

Electronic Supplementary Information for

**A selective pyridinedicarbohydrazide-based “naked-eye” fluorescent probe for detecting Cu2+ ions in aqueous solutions**

**Ali Zamani, Mahmood Tajbakhsh*, Yaghoub Sarrafi**

Department of Organic Chemistry, Faculty of Chemistry, University of Mazandaran, Babolsar, Iran

*E-mail: [tajbaksh@umz.ac.ir](mailto:tajbaksh@umz.ac.ir), [ysarrafi@umz.ac.ir](mailto:ysarrafi@umz.ac.ir)

**Fig. S1** 1HNMR Spectrum of L1 **Fig. S2** 13C NMR Spectrum of L1 **Fig. S3** FT-IR Spectrum of L1 **Fig. S4** 1HNMR Spectrum of L2**Fig. S5** 13CNMR Spectrum of L2 **Fig. S6** FT-IR Spectrum of L2 **Fig. S7** 1HNMR Spectrum of L3 **Fig. S8** 1HNMR Spectrum of L3 **Fig. S9** 13CNMR Spectrum of L3 **Fig. S10** FT-IR Spectrum of L3 **Fig. S11** Mass Spectrum of L3 **Fig. S12** Benesi–Hildebrand plot **Fig. S13** Mass Spectrum of L3-Cu2+ **Fig. S14** Job plot analysis**Fig. S15** IR spectral changes L3 and Cu2+ complexation **Fig. S16** Reversibility cycle


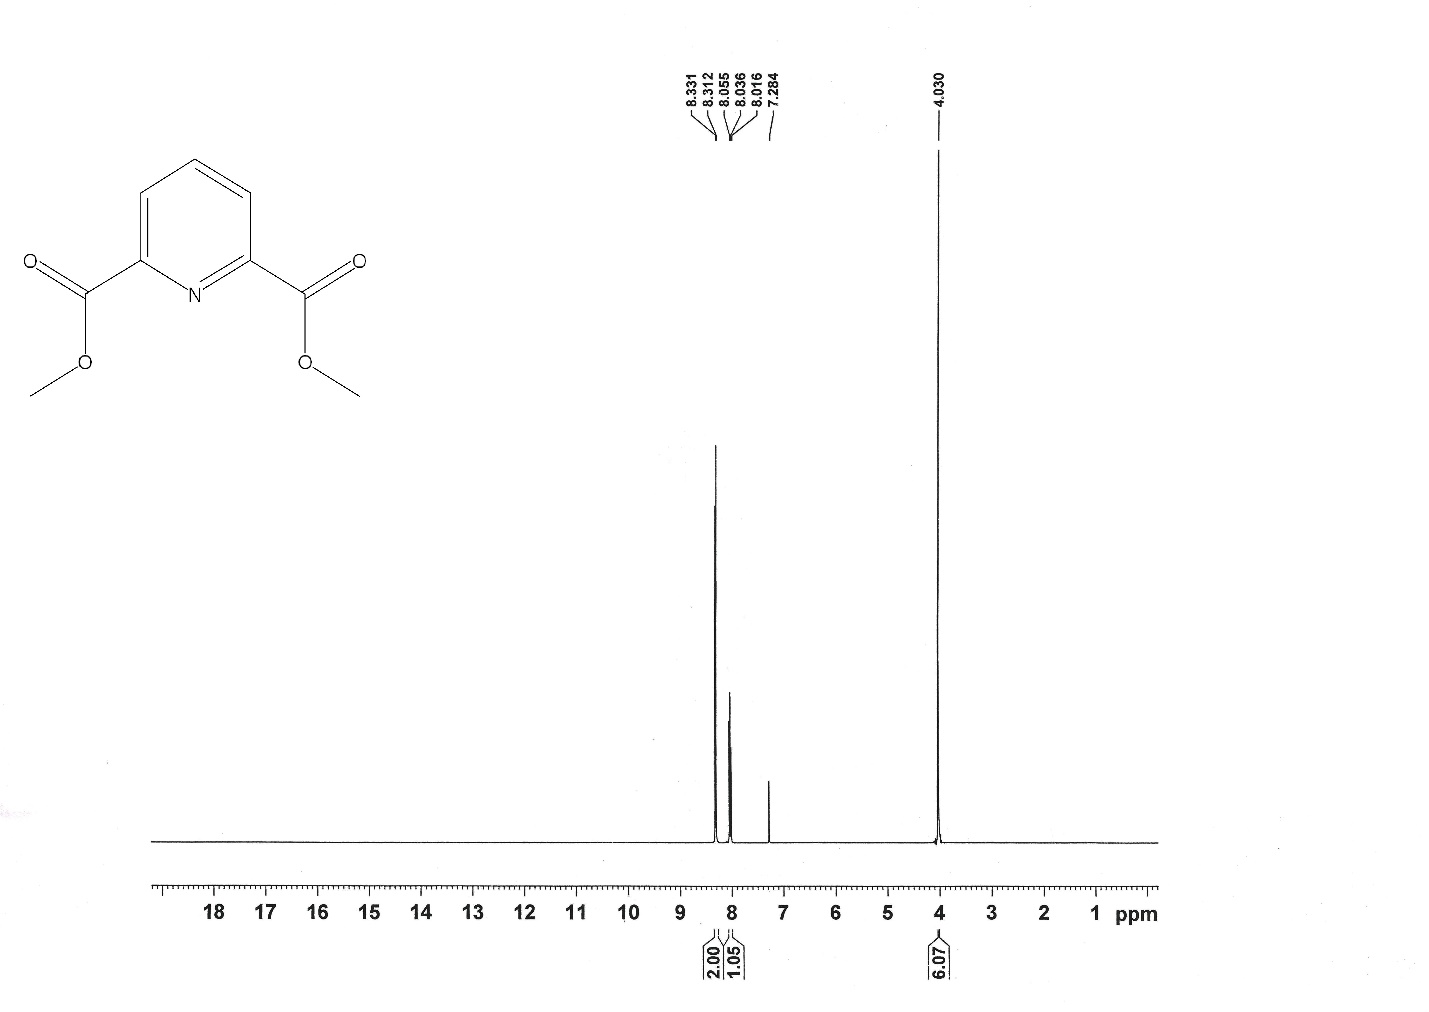


**Fig. S1** 1HNMR (400MHz in CDCl3) of L1


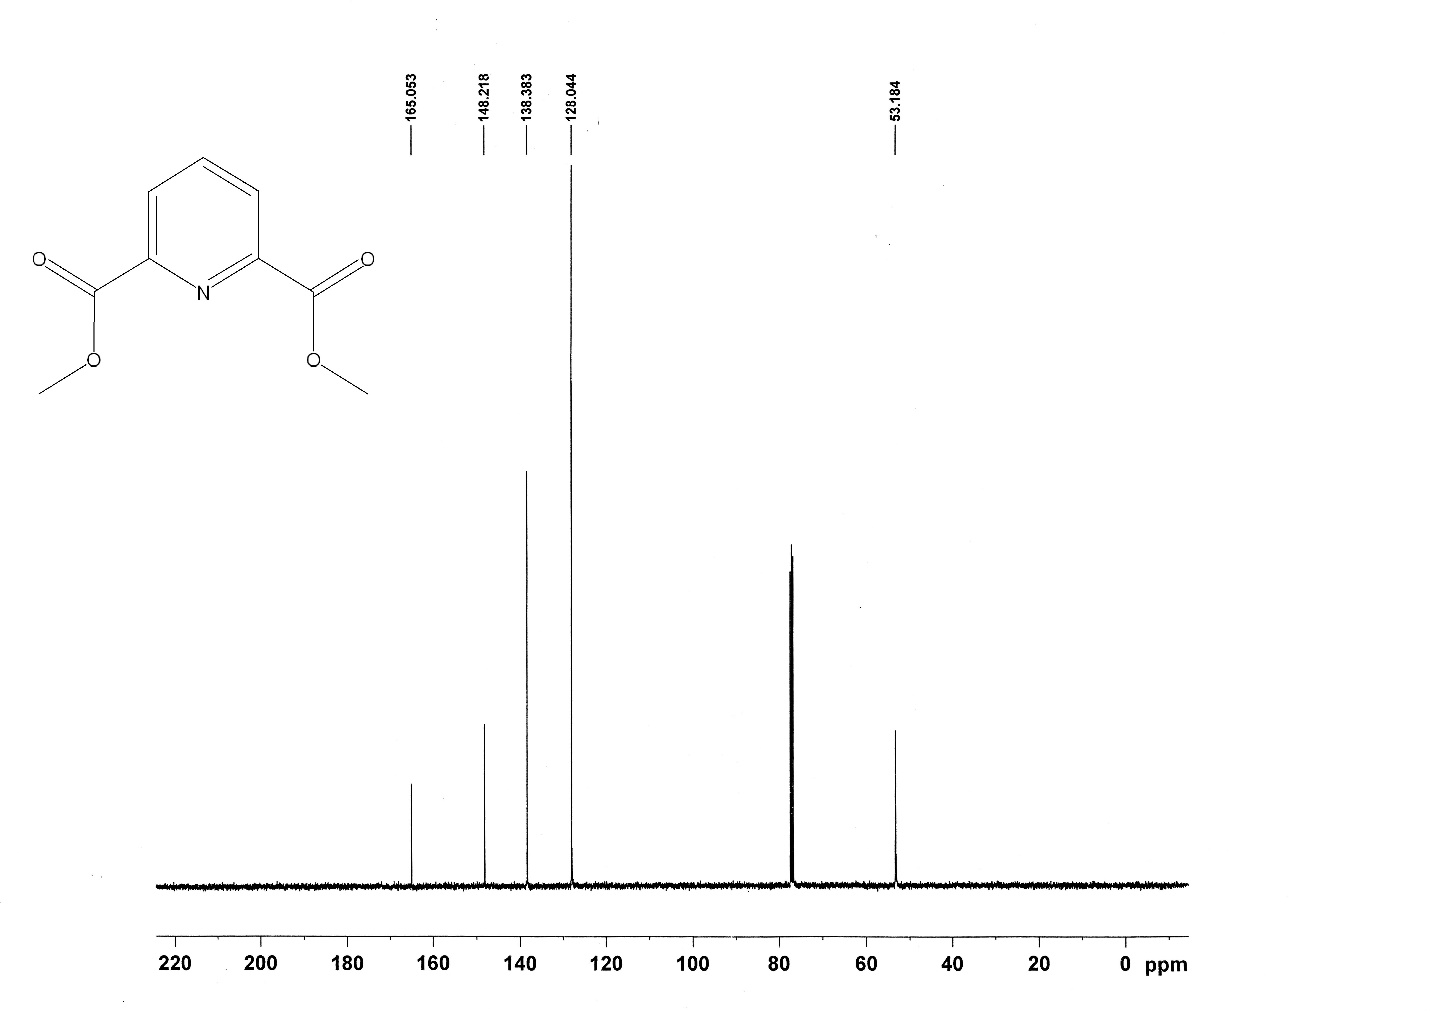


**Fig. S2** 13C NMR (100 MHz in CDCl3) of L1


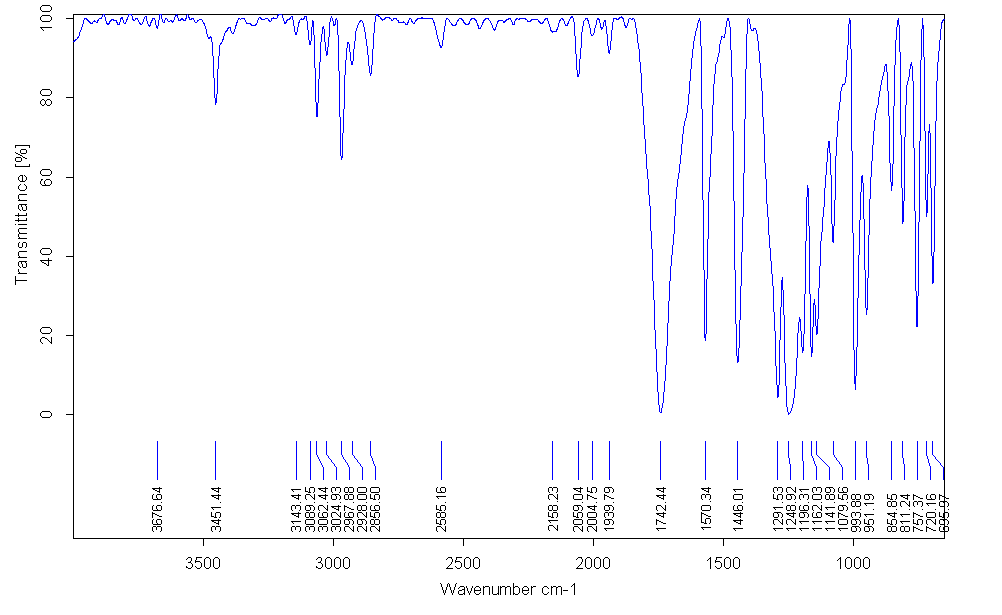


**Fig. S3** FT-IR spectrum of L1


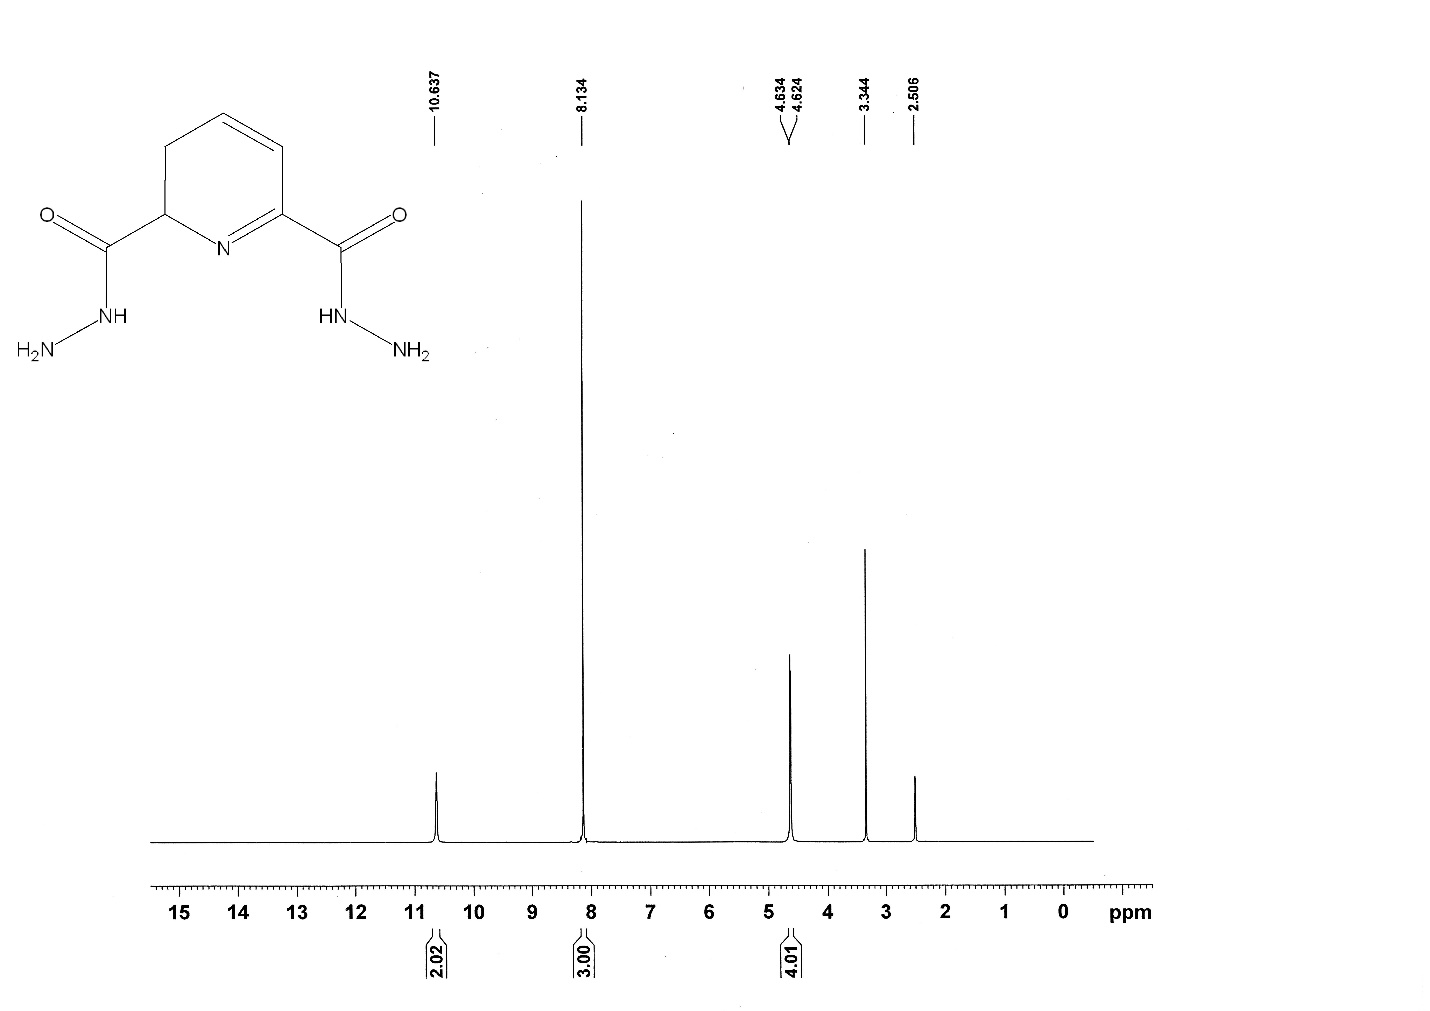


**Fig. S4** 1H NMR (400 MHz in DMSO-d6) of L2


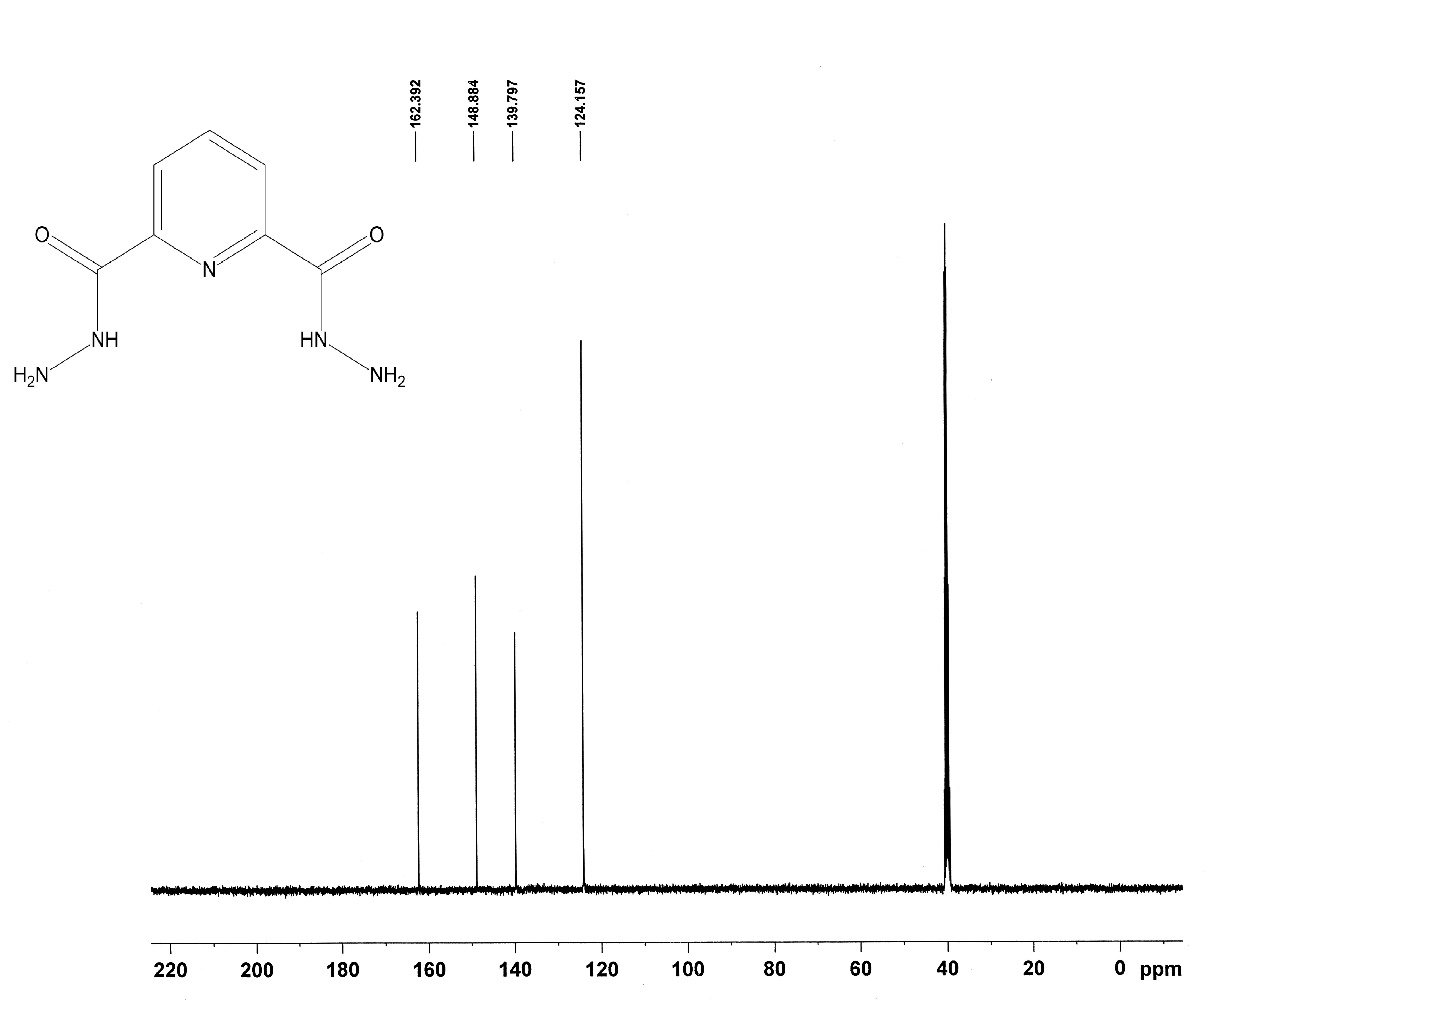


**Fig. S5** 13CNMR Spectrum of L2


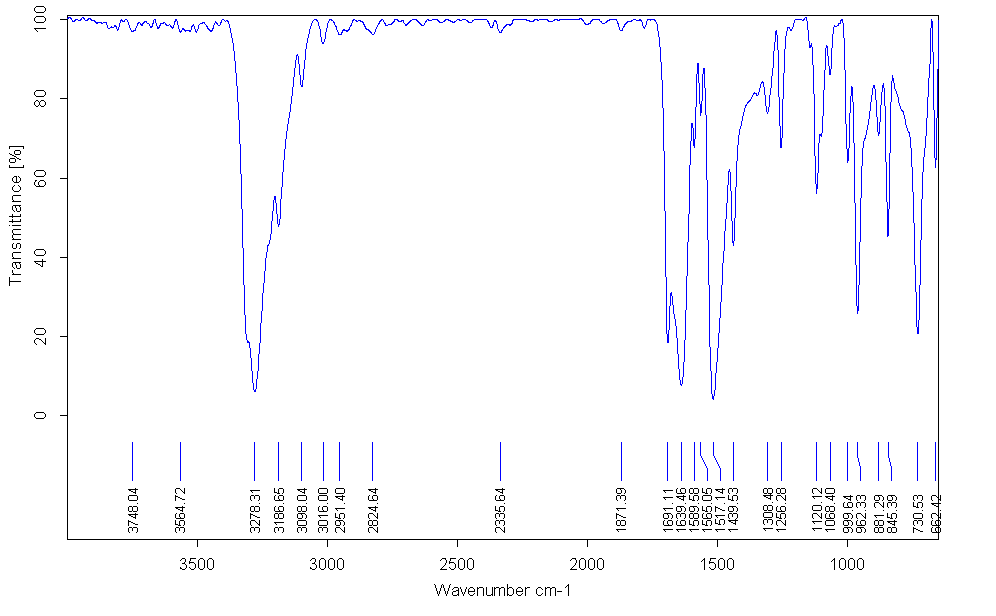
 **Fig. S6** FT-IR Spectrum of L2


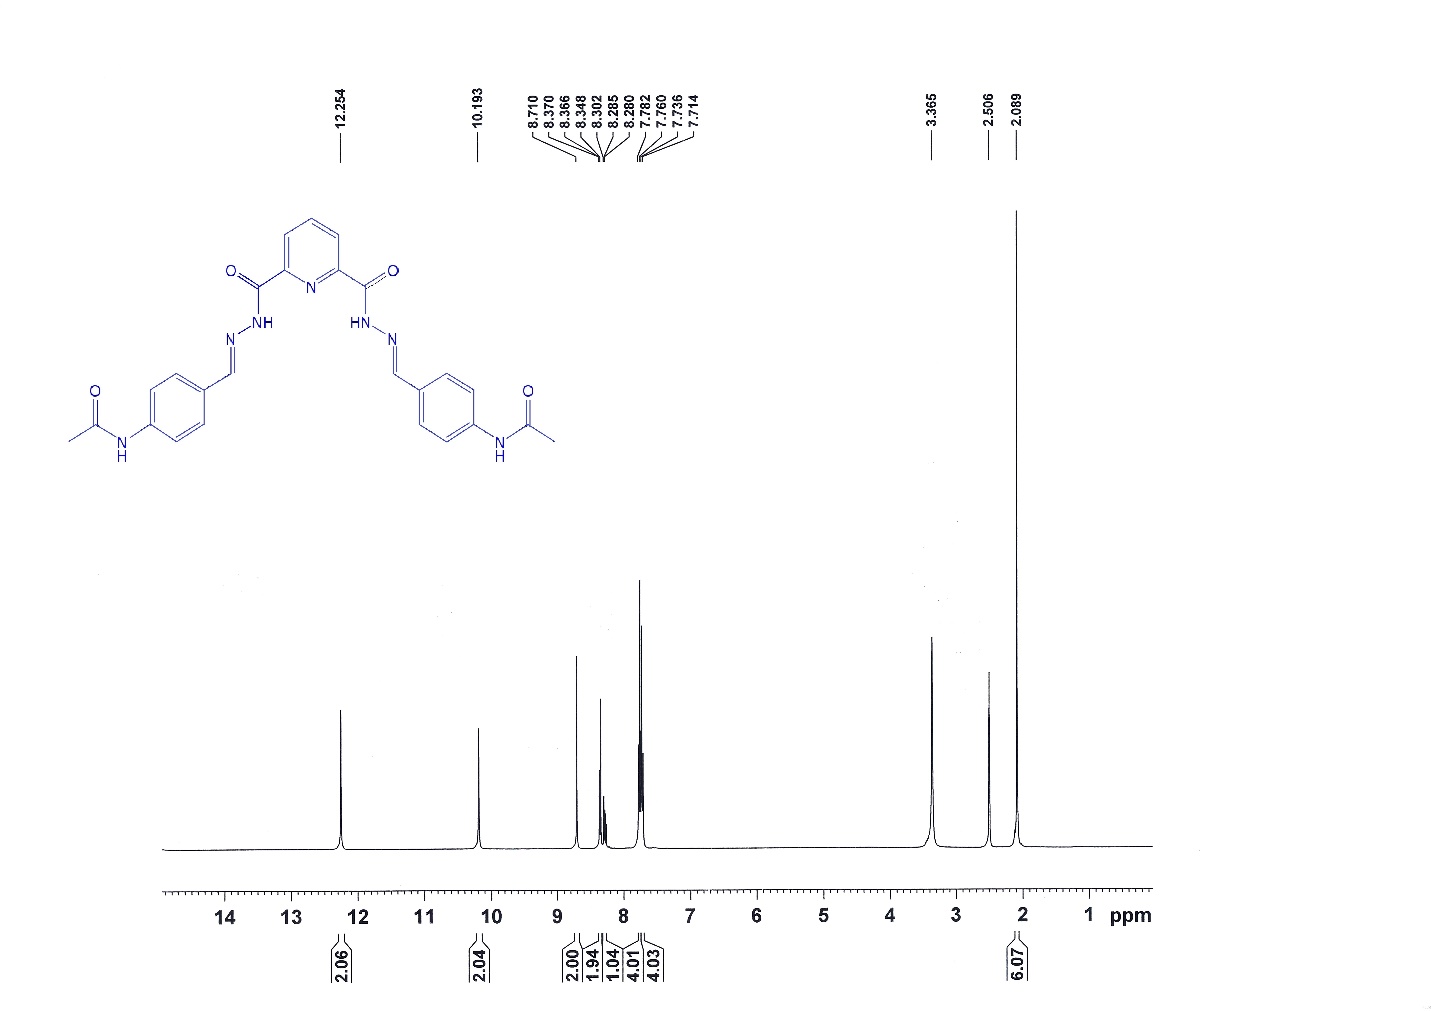


**Fig. S7** 1H NMR (400 MHz in DMSO-d6) of L3


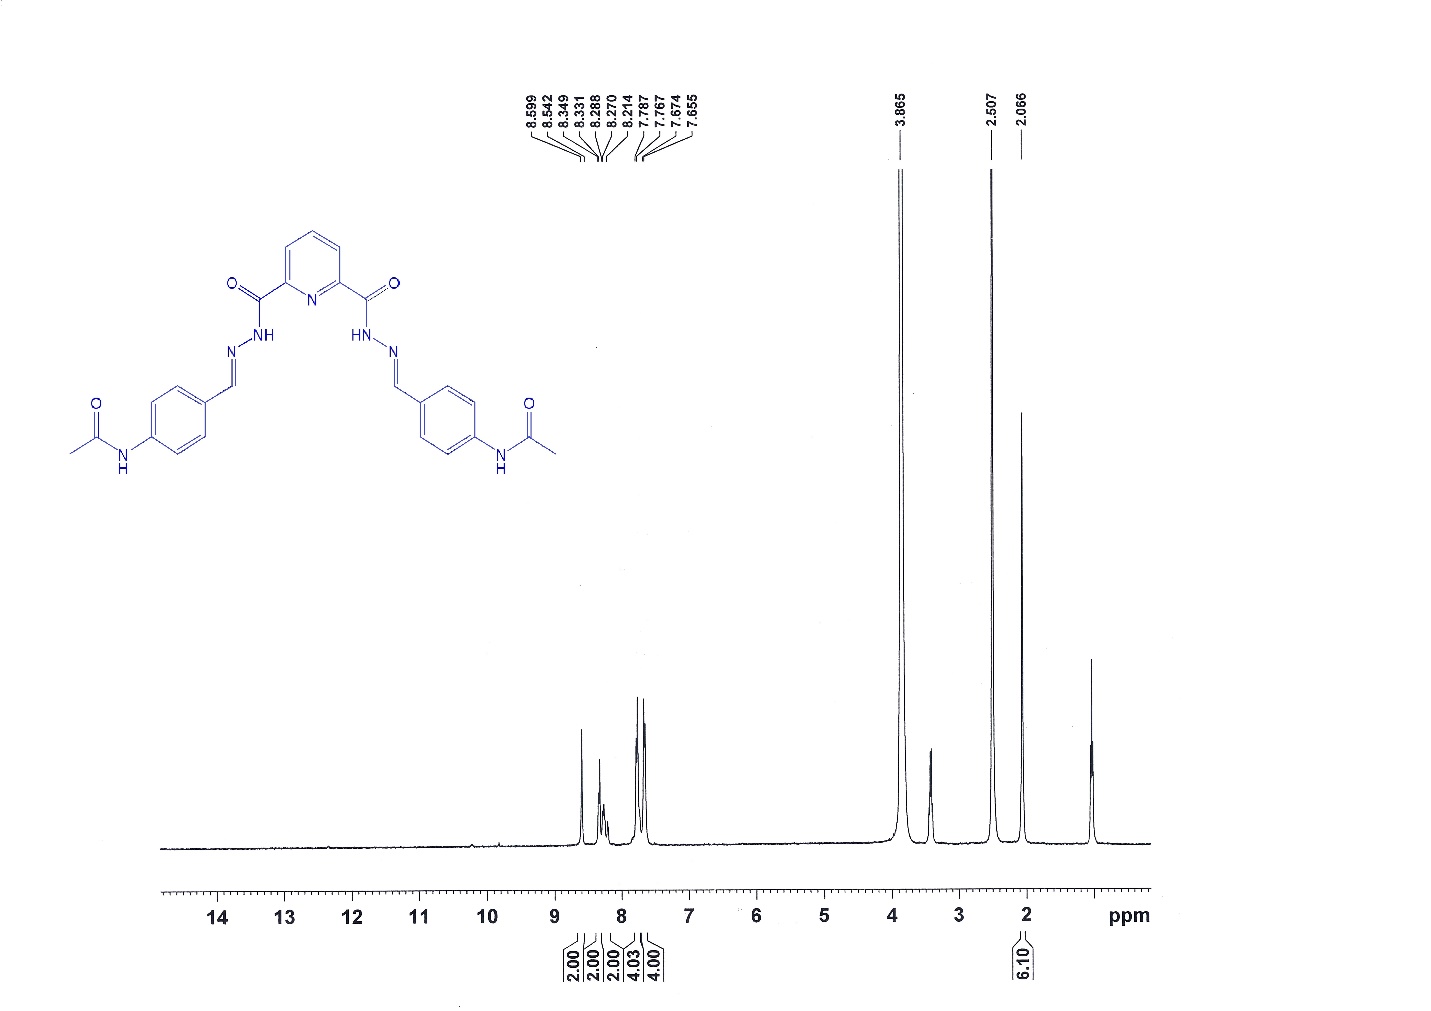


**Fig. S8** 1H NMR (400 MHz in DMSO-d6 (exchange with D2O)) of L3


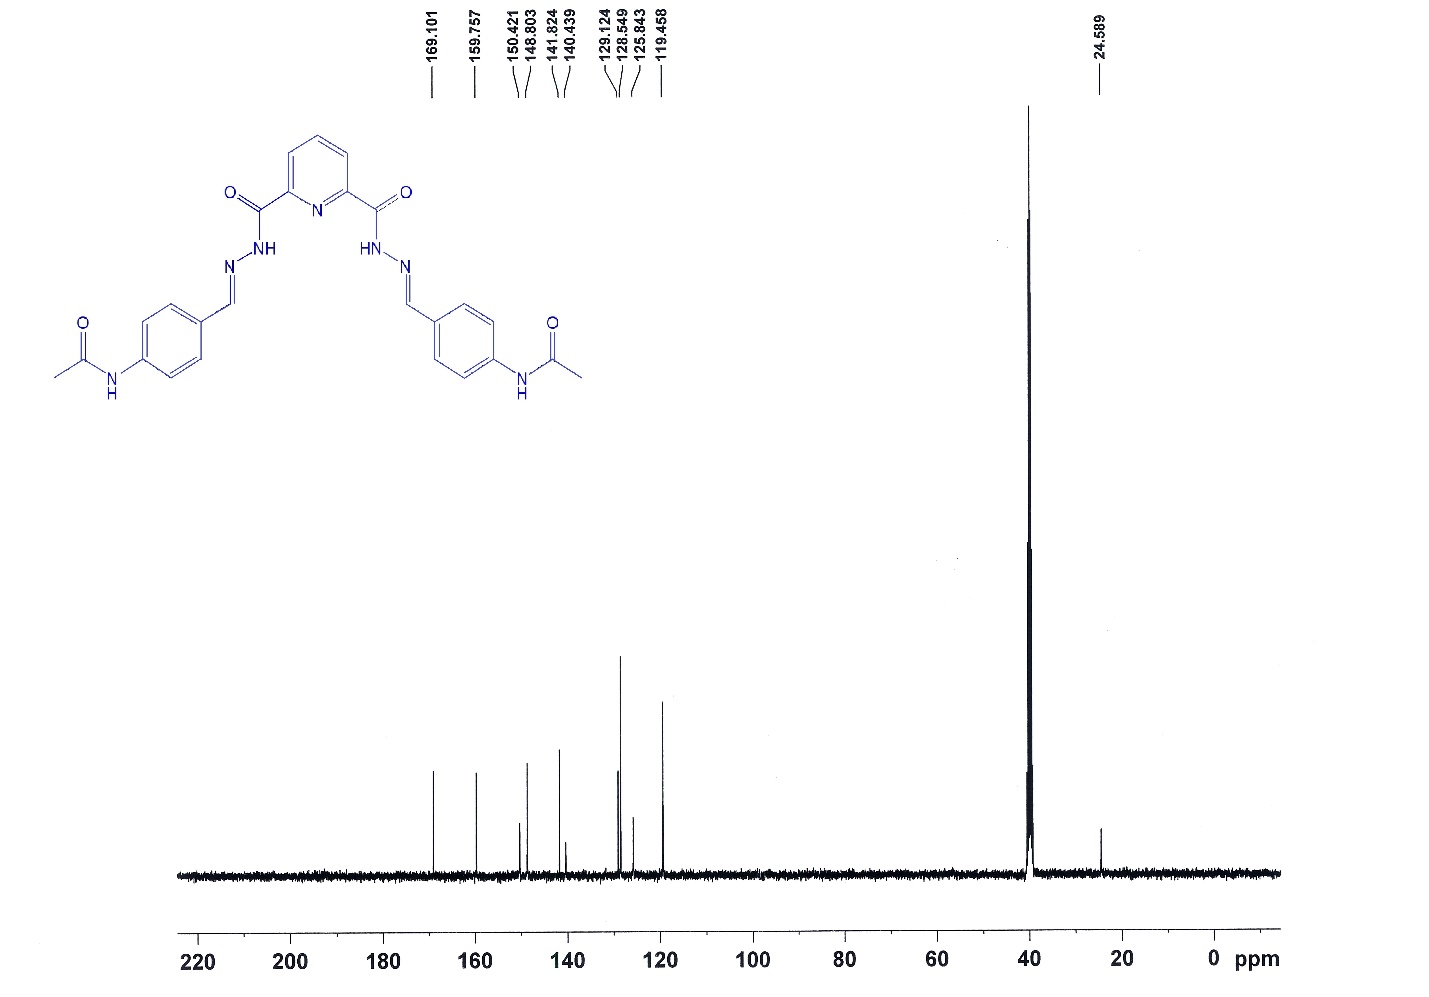


**Fig. S9** 13C NMR (100 MHz in DMSO-d6) of L3


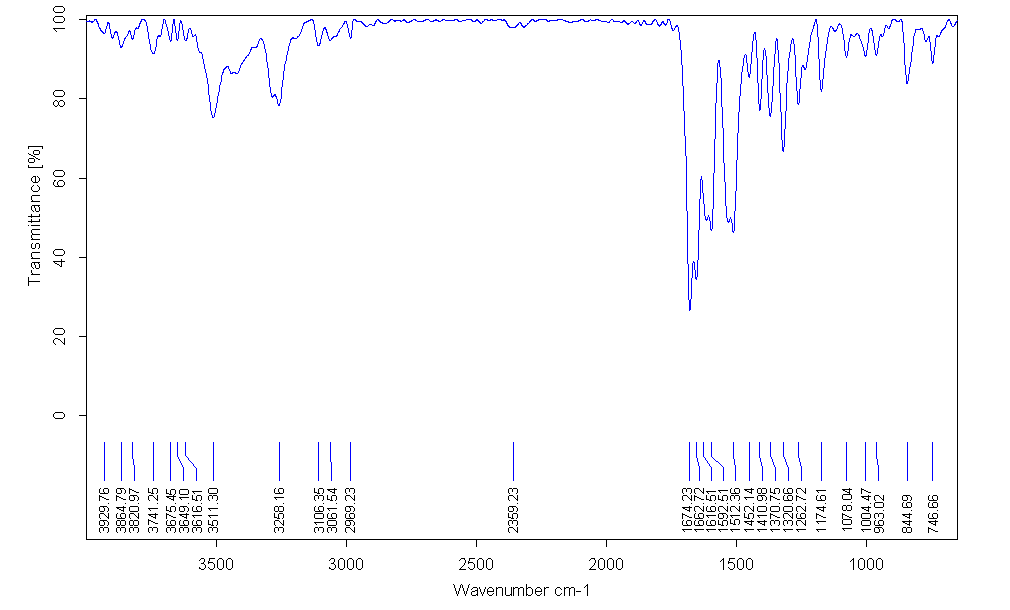


**Fig.S10** FT-IR spectrum of L3


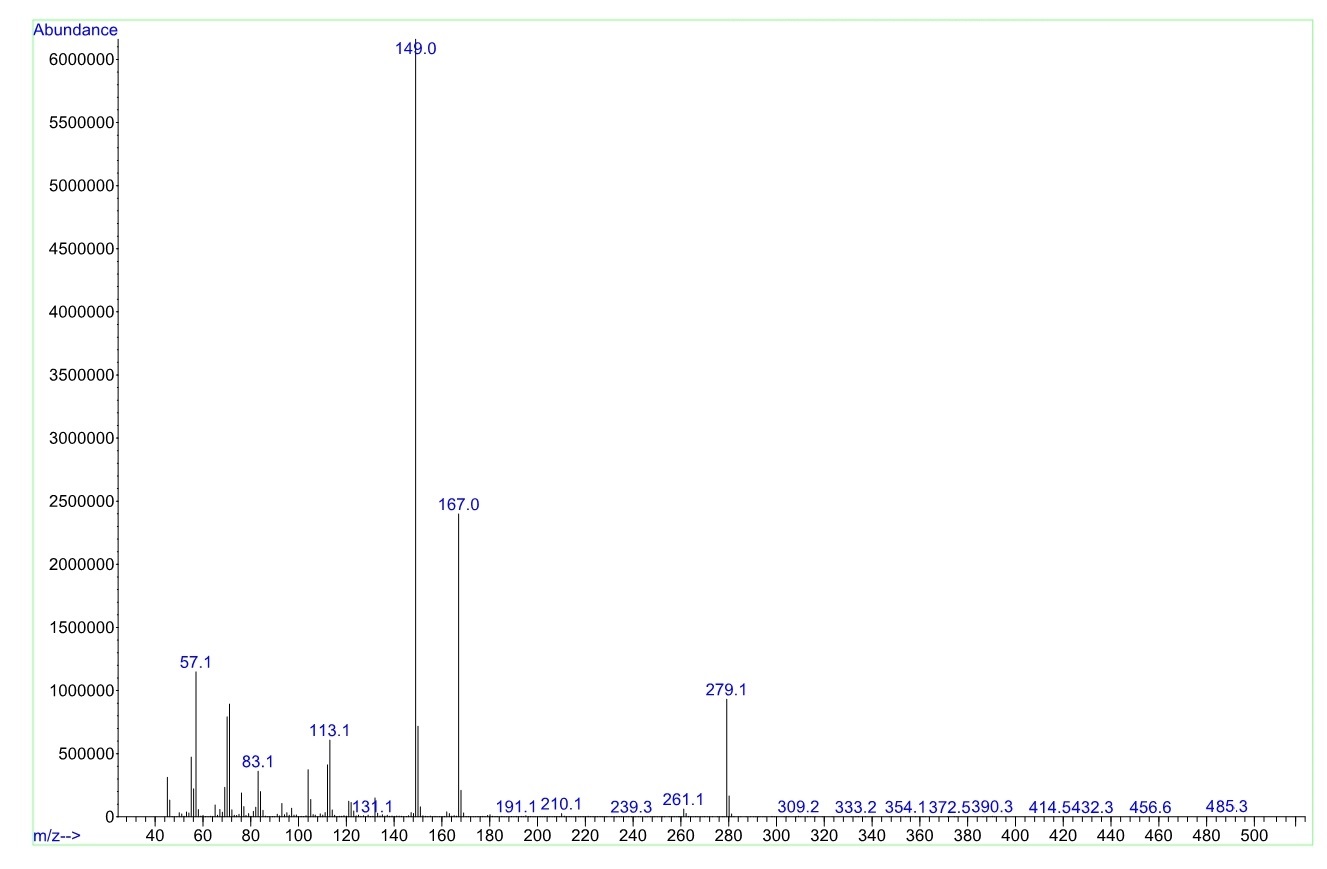


**Fig. S11** Mass Spectrum of L3


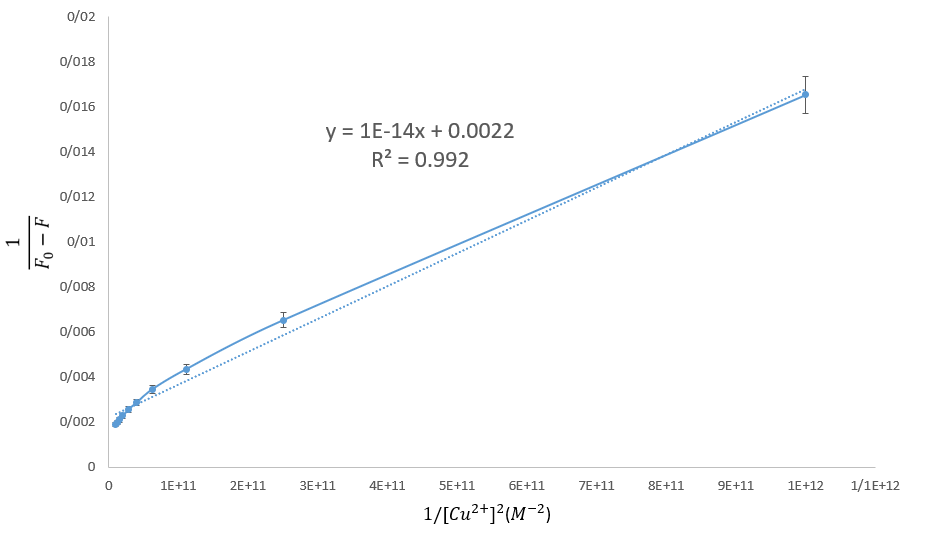


**Fig. 12** Benesi–Hildebrand plot based on 1:2 association stoichiometry for receptor L3– Cu2+ complex (ex = 330 nm, em = 472 nm)


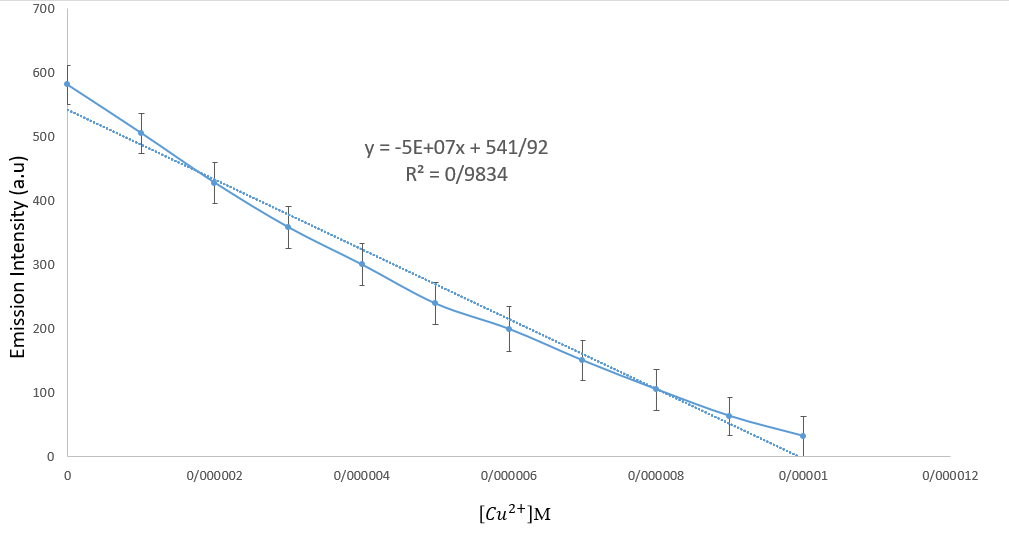


**Fig. S13** Calibration curve of fluorescence intensity of receptor L3 (with Cu2+ ion concentrations


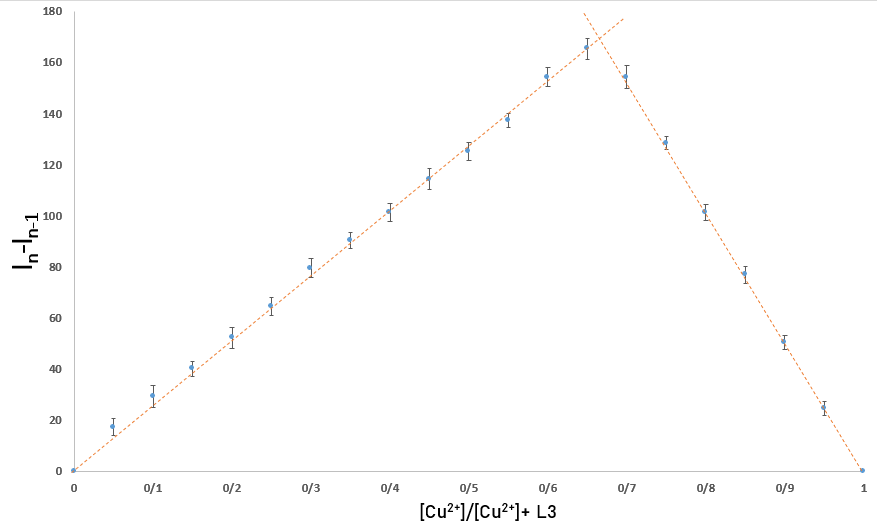


**Fig. S14** Job plot analysis for L3-Cu2+ complex (ex = 330 nm, em = 472 nm)


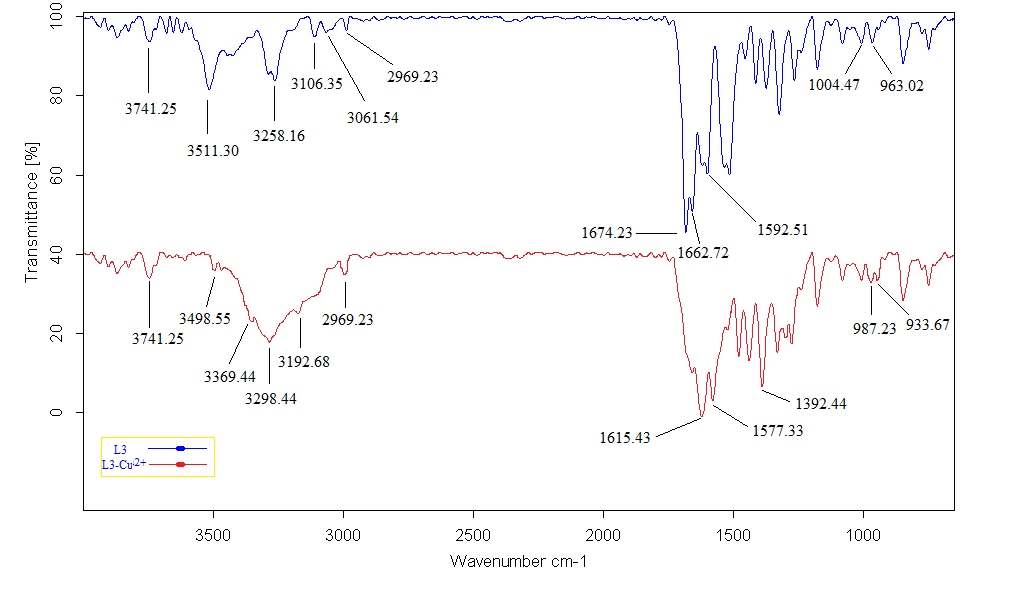


**Fig. S15** IR spectral changes of L3 after the Cu2+ complexation


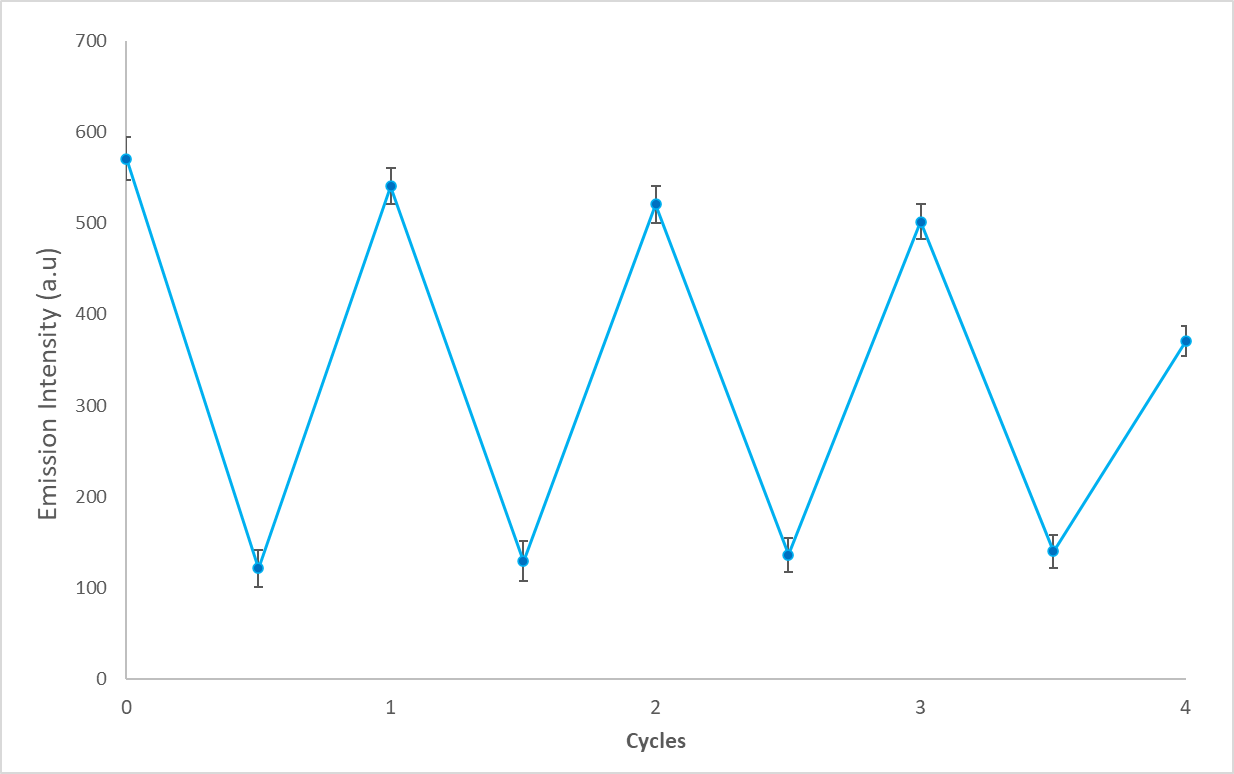


**Fig. S16** Fluorescence emission intensity at 480 nm of compound L3 (5.0 μM) upon the alternate addition of Cu2+ and Na2EDTA in several cycles in DMSO/H2O (7/3, v/v) solution (ex = 330 nm, em = 472 nm)
